# Supplementary material for: Activated Carbon Assisted Fenton-like Treatment of Wastewater Containing Acid Red G
Source: MDPI journal article supplement (doi:10.3390/catal12111358), 2022-11-03
Supplement: s1 [file s1]

Archive with 1 entries (1 files):
- catalysts-1965348-supplementary.pdf
