# Supplementary material for: Activated Carbon Assisted Fenton-like Treatment of Wastewater Containing Acid Red G
Source: MDPI journal article supplement (doi:10.3390/catal12111358), 2022-11-03
Supplement: s1 [file s1 › catalysts-1965348-supplementary.pdf]

## Supplemental Materials

### Activated Carbon Assisted Fenton-like Treatment of Wastewater Containing Acid Red G

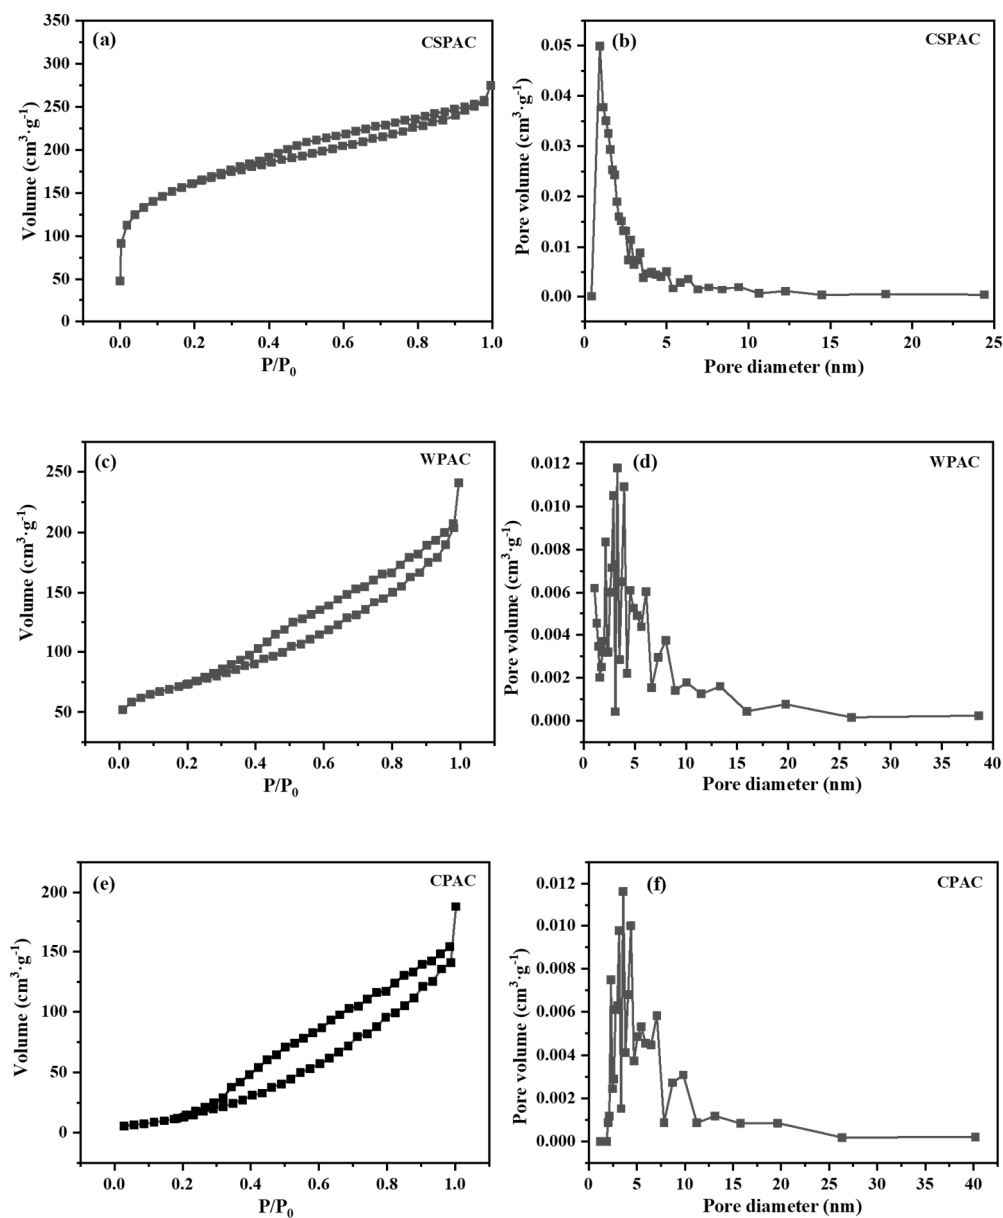

Figure S1.  $N_2$  adsorption-desorption isotherm of CSPAC (a), WPAC (c) and CPAC (e); and pore diameter distribution of CSPAC (b), WPAC (d) and CPAC (f).

**Table S1.** The specific surface area, pore size and pore volume of three kinds of ACs.

| Sample | $S_{\text{BET}}/\text{m}^2\cdot\text{g}^{-1}$ | $V/\text{cm}^3\cdot\text{g}^{-1}$ | $R/\text{nm}$ |
|--------|-----------------------------------------------|-----------------------------------|---------------|
| CSPAC  | 549.50                                        | 0.252                             | 3.10          |
| WPAC   | 254.49                                        | 0.330                             | 5.90          |
| CPAC   | 66.01                                         | 0.341                             | 17.72         |

V: Total pore volume; R: Average pore diameter

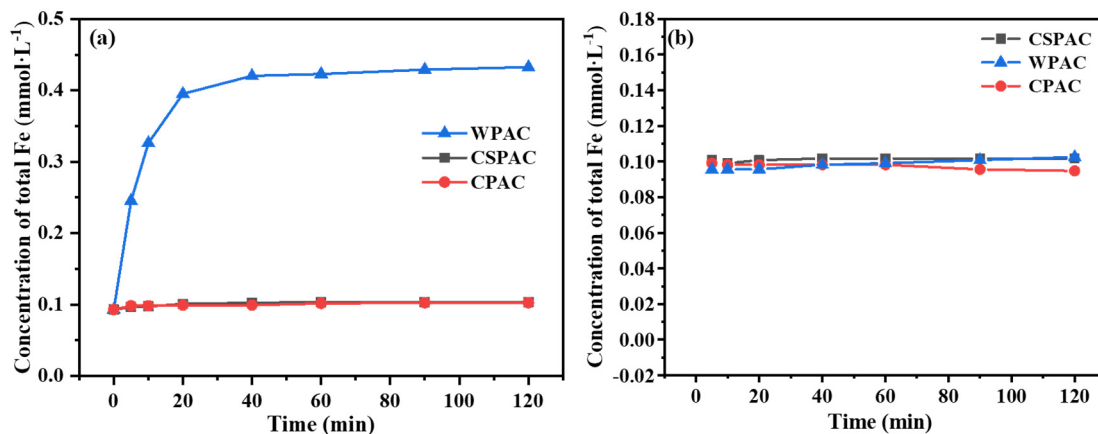

**Figure S2.** Total iron ion concentration in solution (a) before and (b) after acid treatment (0.1 mmol/L of  $\text{FeCl}_3$ , 0.4 g/L of AC, pH=3).

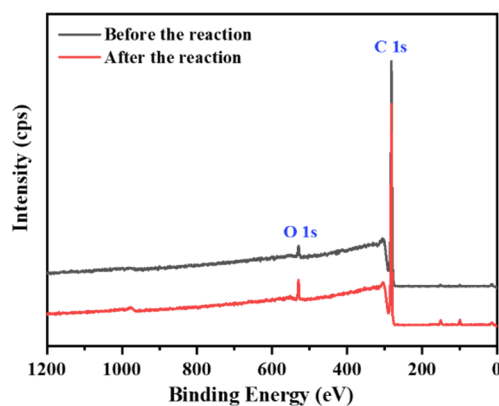

**Figure S3.** Full-scan XPS spectra of CSPAC before and after the reaction in  $\text{Fe}^{3+}/\text{CSPAC}/\text{H}_2\text{O}_2$  system.

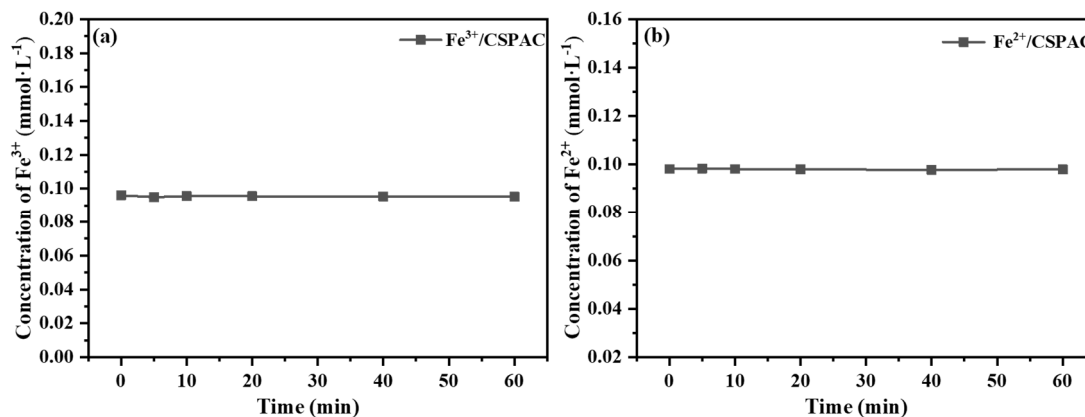

**Figure S4.** Adsorption of (a)  $\text{Fe}^{3+}$  and (b)  $\text{Fe}^{2+}$  by CSPAC (0.1 mmol/L of  $\text{FeCl}_3/\text{FeCl}_2$ , 0.6 g/L of CSPAC, pH=3).
